# Supplementary material
Source: PubMed Central journal article supplement (PMC6823115)
Supplement: NIHMS1042597-supplement-Supplemental_Material_1.pdf [file NIHMS1042597-supplement-Supplemental_Material_1.pdf]

Supplemental Table 1. Clinical Characteristics at Each Occasion

|                | Baseline |      | 1 Year Follow Up |      | 2 Year Follow Up |      | 3 Year Follow Up |      | 4 Year Follow Up |      |
|----------------|----------|------|------------------|------|------------------|------|------------------|------|------------------|------|
|                | N= 310   |      | N= 281           |      | N= 283           |      | N= 244           |      | N= 227           |      |
|                | Mean     | SD   | Mean             | SD   | Mean             | SD   | Mean             | SD   | Mean             | SD   |
| MoCA           | 27.3     | 1.8  | 26.9             | 2.0  | 26.5             | 2.6  | 26.7             | 2.5  | 27.0             | 2.8  |
| LNS            | 10.6     | 2.5  | 10.6             | 2.3  | 10.4             | 2.7  | 10.3             | 2.8  | 10.4             | 2.8  |
| SDMT           | 41.3     | 9.4  | 41.3             | 9.1  | 40.0             | 10.4 | 40.0             | 10.6 | 40.0             | 10.3 |
| Animal Fluency | 21.1     | 5.6  | 21.3             | 5.7  | 21.0             | 5.8  | 21.2             | 5.6  | 21.1             | 5.2  |
| HVLT Learning  | 24.8     | 4.7  | 24.0             | 5.1  | 24.0             | 5.2  | 25.0             | 5.7  | 24.5             | 5.2  |
| HVLT Delay     | 8.5      | 2.4  | 8.3              | 2.7  | 8.3              | 2.8  | 8.5              | 2.7  | 8.5              | 2.9  |
| JOLO           | 13.0     | 1.9  | 12.6             | 2.1  | 13.0             | 2.0  | 12.7             | 2.2  | 13.3             | 1.8  |
| GDS            | 2.4      | 2.7  | 2.4              | 2.7  | 2.5              | 2.8  | 2.5              | 2.7  | 2.2              | 2.3  |
| STAI Trait     | 33.0     | 11.1 | 32.2             | 10.7 | 32.4             | 10.0 | 32.4             | 10.5 | 37.7             | 10.0 |
| UPDRS Depress  | 0.3      | 0.6  | 0.4              | 0.6  | 0.4              | 0.7  | 0.4              | 0.7  | 0.4              | 0.7  |
| UPDRS Apathy   | 0.2      | 0.5  | 0.3              | 0.6  | 0.4              | 0.7  | 0.4              | 0.6  | 0.3              | 0.6  |
| UPDRS Anxiety  | 0.4      | 0.6  | 0.5              | 0.7  | 0.4              | 0.6  | 0.4              | 0.7  | 0.4              | 0.6  |
| UPDRS Motor    | 20.0     | 9.0  | 20.1             | 10.3 | 21.0             | 11.4 | 24.0             | 12.5 | 24.6             | 12.7 |
| Percent GDS ≥5 | 14.9%    |      | 15.2%            |      | 16.5%            |      | 14.7%            |      | 13.6%            |      |

MoCA = Montreal Cognitive Assessment; LNS = Letter Number Sequencing; SDMT = Symbol Digit Modality Test; HVLT = Hopkins Verbal Learning Test; JOLO = Judgment of Line Orientation; GDS = Geriatric Depression Scale STAI = State Trait Anxiety Inventory; UPDRS-III = Unified Parkinson's Disease Rating Scale.
