# Supplementary material
Source: PubMed Central journal article supplement (PMC6823115)
Supplement: NIHMS1042597-supplement-Supplemental_Material_2.pdf [file NIHMS1042597-supplement-Supplemental_Material_2.pdf]

Supplemental Table 2. Multilevel Models Predicting Cognition from Depression, Anxiety & Apathy

| Predictors            | LNS      |           |                  | JOLO<br>Fixed Effects |           |                  | Animal Fluency |           |                  |
|-----------------------|----------|-----------|------------------|-----------------------|-----------|------------------|----------------|-----------|------------------|
|                       | <i>B</i> | <i>SE</i> | <i>p</i>         | <i>B</i>              | <i>SE</i> | <i>p</i>         | <i>B</i>       | <i>SE</i> | <i>p</i>         |
| Depression            | -0.031   | 0.029     | 0.279            | -0.007                | 0.031     | 0.820            | -0.030         | 0.029     | 0.313            |
| Anxiety               | -0.037   | 0.025     | 0.128            | -0.023                | 0.031     | 0.463            | -0.019         | 0.027     | 0.478            |
| Apathy                | -0.029   | 0.023     | 0.200            | -0.030                | 0.028     | 0.285            | -0.019         | 0.025     | 0.440            |
| Depression X Occasion | -0.029   | 0.024     | 0.228            | 0.024                 | 0.028     | 0.383            | 0.008          | 0.026     | 0.747            |
| Anxiety X Occasion    | 0.025    | 0.021     | 0.234            | 0.004                 | 0.024     | 0.881            | <0.001         | 0.024     | 0.999            |
| Apathy X Occasion     | -0.014   | 0.024     | 0.571            | -0.016                | 0.025     | 0.523            | -0.025         | 0.025     | 0.307            |
| Time                  | -0.060   | 0.019     | <b>0.001</b>     | 0.017                 | 0.020     | 0.409            | -0.006         | 0.019     | 0.756            |
| Motor Severity        | 0.022    | 0.026     | 0.398            | -0.005                | 0.029     | 0.849            | -0.038         | 0.028     | 0.171            |
| Age                   | -0.377   | 0.057     | <b>&lt;0.001</b> | -0.269                | 0.055     | <b>&lt;0.001</b> | -0.272         | 0.060     | <b>&lt;0.001</b> |
| Gender                | 0.084    | 0.090     | 0.353            | -0.484                | 0.087     | <b>&lt;0.001</b> | 0.085          | 0.096     | 0.375            |
| Education             | 0.123    | 0.042     | <b>0.004</b>     | 0.177                 | 0.041     | <b>&lt;0.001</b> | 0.173          | 0.045     | <b>&lt;0.001</b> |

Significant p values appear in bold. LNS = Letter Number Sequencing; JOLO = Judgment of Line Orientation.
