# Supplementary material
Source: PubMed Central journal article supplement (PMC6823115)
Supplement: NIHMS1042597-supplement-Supplemental_Material_3.pdf [file NIHMS1042597-supplement-Supplemental_Material_3.pdf]

Supplemental Table 3. Lagged Models Predicting Cognition from Depression, Anxiety & Apathy

| Predictors        | SDMT          |           |                  | JOLO     |           |                  | Animal Fluency |           |                  |
|-------------------|---------------|-----------|------------------|----------|-----------|------------------|----------------|-----------|------------------|
|                   | Fixed Effects |           |                  |          |           |                  |                |           |                  |
|                   | <i>B</i>      | <i>SE</i> | <i>p</i>         | <i>B</i> | <i>SE</i> | <i>p</i>         | <i>B</i>       | <i>SE</i> | <i>p</i>         |
| Depression Lagged | -0.052        | 0.028     | 0.060            | 0.004    | 0.033     | 0.901            | -0.044         | 0.033     | 0.186            |
| Anxiety Lagged    | 0.028         | 0.019     | 0.131            | -0.016   | 0.025     | 0.521            | -0.031         | 0.021     | 0.128            |
| Apathy Lagged     | 0.010         | 0.020     | 0.606            | -0.006   | 0.023     | 0.786            | 0.004          | 0.023     | 0.864            |
| Occasion          | -0.058        | 0.023     | <b>0.011</b>     | 0.072    | 0.029     | <b>0.012</b>     | -0.007         | 0.027     | 0.799            |
| Motor Severity    | -0.127        | 0.027     | <b>&lt;0.001</b> | 0.023    | 0.032     | 0.474            | -0.071         | 0.032     | <b>0.027</b>     |
| Age               | -0.398        | 0.056     | <b>&lt;0.001</b> | -0.265   | 0.059     | <b>&lt;0.001</b> | -0.248         | 0.063     | <b>&lt;0.001</b> |
| Gender            | 0.345         | 0.089     | <b>&lt;0.001</b> | -0.497   | 0.094     | <b>&lt;0.001</b> | 0.108          | 0.101     | 0.285            |
| Education         | 0.217         | 0.042     | <b>&lt;0.001</b> | 0.172    | 0.044     | <b>&lt;0.001</b> | 0.151          | 0.047     | <b>0.002</b>     |

Significant p values appear in bold. SDMT = Symbol Digit Modalities; LNS = Letter Number Sequencing; JOLO = Judgment of Line Orientation.
